# Supplementary material for: Bayesian parameter inference in hydrological modelling using a Hamiltonian Monte Carlo approach with a stochastic rain model
Source: Copernicus journal article supplement (doi:10.5194/hess-27-2935-2023), 2023-08-09
Supplement: Supplementary file 1 [file hess-27-2935-2023-supplement.pdf]

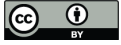

*Supplement of*

## **Bayesian parameter inference in hydrological modelling using a Hamiltonian Monte Carlo approach with a stochastic rain model**

**Simone Ulzega and Carlo Albert**

*Correspondence to:* Simone Ulzega ([simone.ulzega@zhaw.ch](mailto:simone.ulzega@zhaw.ch))

The copyright of individual parts of the supplement might differ from the article licence.

## Supplementary Materials

### S1

We shall first describe the general procedure to derive the prior probability density  $f(\xi)$  for a generic nonlinear SDE model, hence examine the specific case of the model used in this study (Eq. 2).

Let us consider a SDE model in the form,

$$5 \quad \dot{\xi} = F(\xi, t) + G(\xi, t)\eta(t), \quad (\text{S1.1})$$

interpreted according to the Itô convention, where  $\eta$  indicates white noise, with  $\langle \eta(t)\eta(t') \rangle = \delta(t-t')$ , and  $F$  and  $G$  are generic, possibly nonlinear, functions. The probability density for a full model realization can be written as the probability density for the corresponding noise realization  $\eta$ , that is,

$$f(\eta) \propto \exp \left[ -\frac{1}{2} \int_0^T \eta^2(t) dt \right], \quad (\text{S1.2})$$

10 where  $[0, T]$  is the observation time interval. Then, the probability density  $f(\xi)$  is easily obtained by changing coordinates from the noise  $\eta$  to the state variable of interest  $\xi$ , using the model of Eq. S1.1, that is,

$$\eta(t) = \frac{\dot{\xi}(t) - F(\xi, t)}{G(\xi, t)}. \quad (\text{S1.3})$$

Depending on the SDE convention, this transformation might generate additional terms stemming from the Jacobian  $d\xi/d\eta$  (Lau and Lubensky, 2007). Finally, it is convenient to write the probability density  $f(\xi)$  in terms of an action  $\mathcal{S}(\xi, \dot{\xi})$  as,

$$15 \quad f(\xi) \propto \exp \left[ -\mathcal{S}(\xi, \dot{\xi}) \right]. \quad (\text{S1.4})$$

Let us consider now the specific case of the stochastic process of Eq. 2. Using the procedure described above, the action  $\mathcal{S}$  can be written in its continuous form (Lau and Lubensky, 2007) as,

$$\mathcal{S}(\xi, \dot{\xi}) = \int_0^T \frac{\tau}{4} \left( \dot{\xi}(t) + \frac{\xi(t)}{\tau} \right)^2 dt, \quad (\text{S1.5})$$

where  $T$  is the total measurement time. Following Albert et al. (2016), we rewrite Eq. S1.5 in the form,

$$20 \quad \mathcal{S}(\xi, \dot{\xi}) = \int_0^T \left( \frac{\tau}{4} \dot{\xi}^2 + \frac{\xi^2}{4\tau} + \dot{\xi} \frac{\partial U(\xi, t)}{\partial \xi} \right) dt, \quad (\text{S1.6})$$

with  $U(\xi, t) = \xi^2(t)/4$ . Using  $\dot{\xi} \frac{\partial U}{\partial \xi} = \frac{dU}{dt} - \frac{\partial U}{\partial t}$  and  $\frac{\partial U}{\partial t} = 0$ , it is straightforward to obtain,

$$\mathcal{S}(\xi, \dot{\xi}) = \frac{\xi^2(T)}{4} - \frac{\xi^2(0)}{4} + \int_0^T \left( \frac{\tau}{4} \dot{\xi}^2 + \frac{\xi^2}{4\tau} \right) dt, \quad (\text{S1.7})$$

which yields the discretized expression of Eq. 16.

## S2

25 The first harmonic term of the discretized action (Eq. 16) can be written in the form,

$$\sum_{i=2}^N \frac{\tau}{4dt} (\xi_i - \xi_{i-1})^2 = \frac{\tau}{4} \sum_{s=1}^{n_P} \left[ \frac{(\xi_{(s-1)j_P+1} - \xi_{sj_P+1})^2}{j_P dt} + \sum_{k=2}^{j_P} \frac{k}{(k-1)dt} (\xi_{(s-1)j_P+k} - \xi_{(s-1)j_P+k}^*)^2 \right], \quad (\text{S2.1})$$

with  $\xi_{(s-1)j_P+k}^*$  defined by Eq. 19. Using the coordinate transformations of Eqs. 17 and 18, it is straightforward to rewrite S2.1 as,

$$\sum_{i=2}^N \frac{\tau}{4dt} (\xi_i - \xi_{i-1})^2 = \frac{\tau}{4j_P dt} \sum_{s=1}^{n_P} (u_{(s-1)j_P+1} - u_{sj_P+1})^2 + \frac{k\tau}{4(k-1)dt} \sum_{s=1}^{n_P} \sum_{k=2}^{j_P} u_{(s-1)j_P+k}^2. \quad (\text{S2.2})$$

30 Moreover, using Eqs. 17 and 20 one obtains,

$$\sum_{i=2}^N \xi_i^2 = \sum_{s=1}^{n_P} \left[ u_{sj_P+1}^2 + \sum_{k=2}^{j_P} \left( \sum_{l=k}^{j_P+1} \frac{k-1}{l-1} u_{(s-1)j_P+l} + \frac{j_P-k+1}{j_P} u_{(s-1)j_P+1} \right)^2 \right]. \quad (\text{S2.3})$$

Finally, using S2.2 and S2.3, the action  $\mathcal{S}(\boldsymbol{\xi})$  (Eq. 16) can be formulated in the space of  $u$ -coordinates as in Eq.21.

## S3

The runoff observation model  $f(\mathbf{Q}_{\text{obs}} | \boldsymbol{\xi}, \boldsymbol{\theta}, \sigma_z)$  of Eq. 8 needs to be formulated in the  $u$ - rather than  $\xi$ -space. The only term affected by this coordinate transformation is obviously the  $\xi$ -dependent term  $Q_{M,(s-1)j_Q+1}^{(\xi)}$  in the model predicted discharge  $Q_{M,(s-1)j_Q+1}(\boldsymbol{\xi}, \boldsymbol{\theta})$ , with  $s = 1, \dots, n_Q + 1$  (see Eqs. 6 and 7). Using the definition of Eq. 7, straightforward calculations yield the recursive form,

$$Q_{M,(s-1)j_Q+1}^{(\xi)} = \left(1 - \frac{dt}{K}\right)^{j_Q} Q_{M,(s-2)j_Q+1}^{(\xi)} + \left(1 - \frac{dt}{K}\right)^{j_Q-1} r(\xi_{(s-2)j_Q+1}) + \sum_{k=2}^{j_Q} \left(1 - \frac{dt}{K}\right)^{j_Q-k} r(\xi_{(s-2)j_Q+k}), \quad (\text{S3.1})$$

and then with the transformations of Eqs. 17 and 20, after replacing the number of discretization bins for the precipitation data  $j_P$  with that for the discharge data  $j_Q$ ,

$$Q_{M,(s-1)j_Q+1}^{(u)} = \left(1 - \frac{dt}{K}\right)^{j_Q} Q_{M,(s-2)j_Q+1}^{(u)} + \left(1 - \frac{dt}{K}\right)^{j_Q-1} r(u_{(s-2)j_Q+1}) + \sum_{k=2}^{j_Q} \left(1 - \frac{dt}{K}\right)^{j_Q-k} r \left( \sum_{l=k}^{j_Q+1} \frac{k-1}{l-1} u_{(s-2)j_Q+l} + \frac{j_Q-k+1}{j_Q} u_{(s-2)j_Q+1} \right), \quad (\text{S3.2})$$

with  $s = 2, \dots, n_Q + 1$  and  $Q_{M,1}^{(u)} = 0$ . Finally, one has,

$$Q_{M,(s-1)j_Q+1}(\mathbf{u}, \boldsymbol{\theta}) = \frac{S_1}{K} \left(1 - \frac{dt}{K}\right)^{(s-1)j_Q} + A \frac{dt}{K} Q_{M,(s-1)j_Q+1}^{(u)} + \left[ 1 - \left(1 - \frac{dt}{K}\right)^{(s-1)j_Q} \right] Q_{\text{gw}}. \quad (\text{S3.3})$$
